# Supplementary material
Source: publisher site journal article supplement (https://www.spandidos-publications.com/8124/downloadSupplementary)
Supplement: Supplementary file 1 [file downloadSupplementary]

## Sheet: BP
Table SIII. GO enrichment analysis.
Category	Term	Count	%	PValue	Genes	List Total	Pop Hits	Pop Total	Fold Enrichment	Bonferroni	Benjamini	FDR
GOTERM_BP_DIRECT	GO:0006338~chromatin remodeling	21	36.2069	5.72356e-13	ALK, GSK3B, SYK, CSNK2A1, DAPK1, FLT3, SRC, ESR1, EGFR, PIK3CG, PTK2, IGF1R, IKBKB, LCK, KIT, CDK2, PIM1, KDR, CDK1, TOP1, MET	58	917	19416	7.66623	7.52601e-10	7.52649e-10	6.89117e-10
GOTERM_BP_DIRECT	GO:0048013~ephrin receptor signaling pathway	10	17.2414	2.89868e-12	ALK, FLT3, SRC, KIT, KDR, MET, MMP9, PTK2, EGFR, IGF1R	58	85	19416	39.3834	3.81177e-09	1.90588e-09	1.74501e-09
GOTERM_BP_DIRECT	GO:0046777~protein autophosphorylation	11	18.9655	8.26499e-12	ALK, GSK3B, FLT3, SRC, DAPK1, KIT, PIM1, KDR, PTK2, EGFR, IGF1R	58	139	19416	26.4917	1.08684e-08	3.62282e-09	3.31701e-09
GOTERM_BP_DIRECT	GO:0018105~peptidyl-serine phosphorylation	9	15.5172	8.14517e-11	IKBKB, GSK3B, CSNK2A1, PLK1, CDK2, CDK1, TOP1, MAPK14, TGFBR1	58	80	19416	37.6603	1.07109e-07	2.67772e-08	2.45169e-08
GOTERM_BP_DIRECT	GO:0051897~positive regulation of phosphatidylinositol 3-kinase/protein kinase B signal transduction	11	18.9655	2.4969e-10	FLT3, SRC, KIT, KDR, NOX4, F2, PTK2, EGFR, TGFBR1, PIK3CG, IGF1R	58	196	19416	18.7875	3.28342e-07	6.45579e-08	5.91085e-08
GOTERM_BP_DIRECT	GO:0007173~epidermal growth factor receptor signaling pathway	9	15.5172	3.3021e-10	ALK, FLT3, SRC, KIT, KDR, MET, PTK2, EGFR, IGF1R	58	95	19416	31.714	4.34226e-07	6.45579e-08	5.91085e-08
GOTERM_BP_DIRECT	GO:0038063~collagen-activated tyrosine kinase receptor signaling pathway	8	13.7931	3.43654e-10	ALK, SYK, FLT3, KIT, KDR, MET, EGFR, IGF1R	58	58	19416	46.1736	4.51905e-07	6.45579e-08	5.91085e-08
GOTERM_BP_DIRECT	GO:0007169~cell surface receptor protein tyrosine kinase signaling pathway	9	15.5172	1.07608e-09	ALK, SYK, FLT3, SRC, LCK, KDR, MET, EGFR, IGF1R	58	110	19416	27.3893	1.41504e-06	1.7688e-07	1.6195e-07
GOTERM_BP_DIRECT	GO:0007275~multicellular organism development	7	12.069	3.16238e-09	ALK, FLT3, KIT, KDR, MET, EGFR, IGF1R	58	44	19416	53.2571	4.15852e-06	4.62059e-07	4.23056e-07
GOTERM_BP_DIRECT	GO:0048009~insulin-like growth factor receptor signaling pathway	8	13.7931	3.77314e-09	ALK, AR, FLT3, KIT, KDR, MET, EGFR, IGF1R	58	81	19416	33.0626	4.96167e-06	4.96168e-07	4.54286e-07
	TOP 10
GOTERM_BP_DIRECT	GO:0018108~peptidyl-tyrosine phosphorylation	7	12.069	4.77789e-09	SYK, FLT3, SRC, LCK, KDR, PTK2, EGFR	58	47	19416	49.8577	6.28291e-06	5.71175e-07	5.22962e-07
GOTERM_BP_DIRECT	GO:0036323~vascular endothelial growth factor receptor-1 signaling pathway	7	12.069	6.19438e-09	ALK, FLT3, KIT, KDR, MET, EGFR, IGF1R	58	49	19416	47.8227	8.14557e-06	6.78801e-07	6.21503e-07
GOTERM_BP_DIRECT	GO:0035790~platelet-derived growth factor receptor-alpha signaling pathway	7	12.069	7.02321e-09	ALK, FLT3, KIT, KDR, MET, EGFR, IGF1R	58	50	19416	46.8662	9.23548e-06	6.96224e-07	6.37455e-07
GOTERM_BP_DIRECT	GO:0038109~Kit signaling pathway	7	12.069	7.94172e-09	ALK, FLT3, KIT, KDR, MET, EGFR, IGF1R	58	51	19416	45.9473	1.04433e-05	6.96224e-07	6.37455e-07
GOTERM_BP_DIRECT	GO:0038145~macrophage colony-stimulating factor signaling pathway	7	12.069	7.94172e-09	ALK, FLT3, KIT, KDR, MET, EGFR, IGF1R	58	51	19416	45.9473	1.04433e-05	6.96224e-07	6.37455e-07
GOTERM_BP_DIRECT	GO:0031547~brain-derived neurotrophic factor receptor signaling pathway	7	12.069	1.13124e-08	ALK, FLT3, KIT, KDR, MET, EGFR, IGF1R	58	54	19416	43.3946	1.48756e-05	8.75044e-07	8.01181e-07
GOTERM_BP_DIRECT	GO:0035791~platelet-derived growth factor receptor-beta signaling pathway	7	12.069	1.13124e-08	ALK, FLT3, KIT, KDR, MET, EGFR, IGF1R	58	54	19416	43.3946	1.48756e-05	8.75044e-07	8.01181e-07
GOTERM_BP_DIRECT	GO:0048012~hepatocyte growth factor receptor signaling pathway	7	12.069	1.41573e-08	ALK, FLT3, KIT, KDR, MET, EGFR, IGF1R	58	56	19416	41.8448	1.86166e-05	1.03427e-06	9.46965e-07
GOTERM_BP_DIRECT	GO:0043066~negative regulation of apoptotic process	13	22.4138	2.09982e-08	GSK3B, DAPK1, SRC, PLK1, MIF, MMP9, EGFR, TGFBR1, PTK2, IGF1R, PIM1, CDK1, MCL1	58	506	19416	8.60052	2.76123e-05	1.4533e-06	1.33062e-06
GOTERM_BP_DIRECT	GO:0008284~positive regulation of cell population proliferation	13	22.4138	2.34022e-08	CSNK2A1, FLT3, ODC1, MIF, F2, EGFR, TGFBR1, PTK2, IGF1R, AR, ADAM17, CDK2, KDR	58	511	19416	8.51636	3.07734e-05	1.5387e-06	1.40881e-06
GOTERM_BP_DIRECT	GO:0038084~vascular endothelial growth factor signaling pathway	7	12.069	2.64447e-08	ALK, FLT3, KIT, KDR, MET, EGFR, IGF1R	58	62	19416	37.7953	3.47742e-05	1.65594e-06	1.51616e-06
GOTERM_BP_DIRECT	GO:0008286~insulin receptor signaling pathway	8	13.7931	4.67502e-08	ALK, GSK3B, FLT3, KIT, KDR, MET, EGFR, IGF1R	58	116	19416	23.0868	6.14746e-05	2.67469e-06	2.44892e-06
GOTERM_BP_DIRECT	GO:0038083~peptidyl-tyrosine autophosphorylation	5	8.62069	4.67816e-08	ALK, LCK, KDR, EGFR, IGF1R	58	13	19416	128.753	6.1516e-05	2.67469e-06	2.44892e-06
GOTERM_BP_DIRECT	GO:0006468~protein phosphorylation	10	17.2414	1.66348e-07	IKBKB, GSK3B, CDK6, CSNK2A1, SYK, DAPK1, LCK, PLK1, CDK2, PIM1	58	292	19416	11.4643	0.000218723	9.11446e-06	8.34511e-06
GOTERM_BP_DIRECT	GO:0008543~fibroblast growth factor receptor signaling pathway	7	12.069	5.29306e-07	ALK, FLT3, KIT, KDR, MET, EGFR, IGF1R	58	102	19416	22.9736	0.000695796	2.78415e-05	2.54914e-05
GOTERM_BP_DIRECT	GO:0009410~response to xenobiotic stimulus	9	15.5172	7.97392e-07	ADAM17, ABCC1, ABCB1, MAOB, SRC, LCK, CDK1, TOP1, PTGS2	58	257	19416	11.7231	0.00104802	3.97656e-05	3.64089e-05
GOTERM_BP_DIRECT	GO:0007165~signal transduction	17	29.3103	8.16479e-07	ALK, SYK, CSNK2A1, SRC, MAPK14, ESR1, EGFR, TGFBR1, ESR2, IGF1R, AR, TTR, CDK6, PDE10A, KIT, CDK2, MET	58	1326	19416	4.29178	0.00107309	3.97656e-05	3.64089e-05
GOTERM_BP_DIRECT	GO:0010629~negative regulation of gene expression	9	15.5172	3.55238e-06	GSK3B, TERT, NOS2, SRC, CDK1, KDR, MIF, ESR1, XDH	58	314	19416	9.59499	0.00466049	0.000166835	0.000152752
GOTERM_BP_DIRECT	GO:0071392~cellular response to estradiol stimulus	5	8.62069	4.57296e-06	CCNA2, ESR1, EGFR, ESR2, IGF1R	58	38	19416	44.0472	0.00599542	0.00020736	0.000189857
GOTERM_BP_DIRECT	GO:1900182~positive regulation of protein localization to nucleus	5	8.62069	5.6371e-06	PARP1, SRC, PLK1, CDK1, F2	58	40	19416	41.8448	0.0073854	0.000247093	0.000226236
GOTERM_BP_DIRECT	GO:1904646~cellular response to amyloid-beta	5	8.62069	1.08351e-05	GSK3B, ABCC1, SYK, PARP1, IGF1R	58	47	19416	35.6126	0.0141472	0.000459617	0.000420821
GOTERM_BP_DIRECT	GO:0001525~angiogenesis	8	13.7931	1.17447e-05	SYK, NOS3, KDR, CYP1B1, MAPK14, PTGS2, PTK2, PIK3CG	58	264	19416	10.1442	0.0153258	0.000482635	0.000441896
GOTERM_BP_DIRECT	GO:0000086~G2/M transition of mitotic cell cycle	5	8.62069	1.50487e-05	CCNA2, ABCB1, PLK1, CDK2, CDK1	58	51	19416	32.8195	0.0195947	0.000599667	0.000549049
GOTERM_BP_DIRECT	GO:0048146~positive regulation of fibroblast proliferation	5	8.62069	1.75568e-05	CCNA2, CDK6, MIF, ESR1, EGFR	58	53	19416	31.581	0.0228229	0.000679036	0.000621718
GOTERM_BP_DIRECT	GO:0045087~innate immune response	10	17.2414	3.58595e-05	IKBKB, SYK, PARP1, SRC, DAPK1, LCK, ARG1, MMP3, MIF, PIK3CG	58	564	19416	5.93544	0.0460615	0.00134729	0.00123357
GOTERM_BP_DIRECT	GO:0038096~Fc-gamma receptor signaling pathway involved in phagocytosis	4	6.89655	4.07483e-05	SYK, NOS2, SRC, PTK2	58	23	19416	58.2189	0.0521747	0.00148844	0.0013628
GOTERM_BP_DIRECT	GO:0030168~platelet activation	5	8.62069	4.20042e-05	SYK, SRC, LCK, F2, MAPK14	58	66	19416	25.3605	0.0537389	0.00149285	0.00136684
GOTERM_BP_DIRECT	GO:0006915~apoptotic process	10	17.2414	7.45204e-05	PFKFB3, CSNK2A1, PARP1, DAPK1, CDK1, PIM1, MAPK14, MMP9, TGFBR1, MCL1	58	620	19416	5.39933	0.0933493	0.0025788	0.00236112
GOTERM_BP_DIRECT	GO:0048010~vascular endothelial growth factor receptor signaling pathway	4	6.89655	0.000101714	SRC, KDR, MAPK14, PTK2	58	31	19416	43.1947	0.125201	0.00342959	0.0031401
GOTERM_BP_DIRECT	GO:0006527~arginine catabolic process	3	5.17241	0.000126059	NOS2, NOS3, ARG1	58	6	19416	167.379	0.152766	0.00414419	0.00379438
GOTERM_BP_DIRECT	GO:0030307~positive regulation of cell growth	5	8.62069	0.000129545	ADAM17, CSNK2A1, F2, EGFR, TGFBR1	58	88	19416	19.0204	0.156641	0.0041549	0.00380419
GOTERM_BP_DIRECT	GO:2000379~positive regulation of reactive oxygen species metabolic process	4	6.89655	0.000146874	CYP1B1, F2, MAPK14, XDH	58	35	19416	38.2581	0.175644	0.00459855	0.00421038
GOTERM_BP_DIRECT	GO:0016477~cell migration	7	12.069	0.000151371	SYK, CDK1, KDR, MET, MMP9, PTK2, PIK3CG	58	275	19416	8.52113	0.180506	0.00462915	0.0042384
GOTERM_BP_DIRECT	GO:0045937~positive regulation of phosphate metabolic process	3	5.17241	0.00017615	FLT3, KIT, KDR	58	7	19416	143.468	0.206782	0.00514748	0.00471298
GOTERM_BP_DIRECT	GO:0071393~cellular response to progesterone stimulus	3	5.17241	0.00017615	SRC, CYP1B1, IGF1R	58	7	19416	143.468	0.206782	0.00514748	0.00471298
GOTERM_BP_DIRECT	GO:0030335~positive regulation of cell migration	7	12.069	0.000183731	ADAM17, KIT, KDR, PTK2, EGFR, TGFBR1, IGF1R	58	285	19416	8.22214	0.214652	0.00525231	0.00480896
GOTERM_BP_DIRECT	GO:0043410~positive regulation of MAPK cascade	6	10.3448	0.000253719	AR, SYK, FLT3, KIT, KDR, IGF1R	58	193	19416	10.407	0.283719	0.00709873	0.00649952
GOTERM_BP_DIRECT	GO:0071222~cellular response to lipopolysaccharide	6	10.3448	0.000285521	NOS2, SRC, MMP3, MAPK14, PTGS2, MMP9	58	198	19416	10.1442	0.313064	0.00782209	0.00716182
GOTERM_BP_DIRECT	GO:0008584~male gonad development	5	8.62069	0.000295252	AR, KIT, CYP1B1, ESR1, TGFBR1	58	109	19416	15.3559	0.321801	0.00792361	0.00725477
GOTERM_BP_DIRECT	GO:0150077~regulation of neuroinflammatory response	3	5.17241	0.000375331	MMP3, PTGS2, MMP9	58	10	19416	100.428	0.389608	0.00967766	0.00886076
GOTERM_BP_DIRECT	GO:0051128~regulation of cellular component organization	3	5.17241	0.000375331	GSK3B, ADAM17, PTK2	58	10	19416	100.428	0.389608	0.00967766	0.00886076
GOTERM_BP_DIRECT	GO:0043065~positive regulation of apoptotic process	7	12.069	0.000383992	SRC, DAPK1, CYP1B1, PTGS2, MMP9, TGFBR1, MCL1	58	327	19416	7.16609	0.396523	0.00971057	0.00889089
GOTERM_BP_DIRECT	GO:0035556~intracellular signal transduction	8	13.7931	0.000421907	GSK3B, SYK, SRC, DAPK1, LCK, KIT, MAPK14, TGFBR1	58	468	19416	5.72237	0.425884	0.0104681	0.00958445
GOTERM_BP_DIRECT	GO:0050673~epithelial cell proliferation	4	6.89655	0.000452028	AR, KIT, KDR, EGFR	58	51	19416	26.2556	0.44819	0.0109473	0.0100233
GOTERM_BP_DIRECT	GO:1900015~regulation of cytokine production involved in inflammatory response	3	5.17241	0.000457873	NOS2, ALOX5, MAPK14	58	11	19416	91.2978	0.452417	0.0109473	0.0100233
GOTERM_BP_DIRECT	GO:0034614~cellular response to reactive oxygen species	4	6.89655	0.00053505	SRC, MMP3, MMP9, EGFR	58	54	19416	24.7969	0.505288	0.0125641	0.0115036
GOTERM_BP_DIRECT	GO:0031401~positive regulation of protein modification process	3	5.17241	0.000646901	FLT3, KIT, KDR	58	13	19416	77.252	0.572991	0.0146668	0.0134288
GOTERM_BP_DIRECT	GO:0045737~positive regulation of cyclin-dependent protein serine/threonine kinase activity	3	5.17241	0.000646901	ADAM17, PIM1, EGFR	58	13	19416	77.252	0.572991	0.0146668	0.0134288
GOTERM_BP_DIRECT	GO:0090398~cellular senescence	4	6.89655	0.00066009	CDK2, MIF, MAPK14, IGF1R	58	58	19416	23.0868	0.580338	0.0147122	0.0134703
GOTERM_BP_DIRECT	GO:0032496~response to lipopolysaccharide	5	8.62069	0.000867041	ADAM17, MAOB, NOS2, NOS3, PTGS2	58	145	19416	11.5434	0.68039	0.0190026	0.0173986
GOTERM_BP_DIRECT	GO:0042127~regulation of cell population proliferation	5	8.62069	0.000983624	ALK, NOS2, KIT, PTK2, EGFR	58	150	19416	11.1586	0.725856	0.0206563	0.0189127
GOTERM_BP_DIRECT	GO:0090336~positive regulation of brown fat cell differentiation	3	5.17241	0.000989618	PIM1, MAPK14, PTGS2	58	16	19416	62.7672	0.728011	0.0206563	0.0189127
GOTERM_BP_DIRECT	GO:1904645~response to amyloid-beta	3	5.17241	0.000989618	MMP13, MMP3, MMP9	58	16	19416	62.7672	0.728011	0.0206563	0.0189127
GOTERM_BP_DIRECT	GO:0045893~positive regulation of DNA-templated transcription	9	15.5172	0.00110963	CCNA2, IKBKB, AR, CDK2, PIM1, ESR1, EGFR, ESR2, TGFBR1	58	717	19416	4.20199	0.767757	0.0223043	0.0204216
GOTERM_BP_DIRECT	GO:0071732~cellular response to nitric oxide	3	5.17241	0.00111945	CCNA2, CDK2, MMP3	58	17	19416	59.0751	0.770742	0.0223043	0.0204216
GOTERM_BP_DIRECT	GO:2000573~positive regulation of DNA biosynthetic process	3	5.17241	0.00111945	CCNA2, CYP1B1, NOX4	58	17	19416	59.0751	0.770742	0.0223043	0.0204216
GOTERM_BP_DIRECT	GO:0007623~circadian rhythm	4	6.89655	0.00114222	GSK3B, NOS2, TOP1, EGFR	58	70	19416	19.1291	0.777512	0.0224183	0.0205259
GOTERM_BP_DIRECT	GO:2000811~negative regulation of anoikis	3	5.17241	0.00140225	SRC, PTK2, MCL1	58	19	19416	52.8566	0.842016	0.0267241	0.0244683
GOTERM_BP_DIRECT	GO:0060065~uterus development	3	5.17241	0.00140225	SRC, ESR1, CYP19A1	58	19	19416	52.8566	0.842016	0.0267241	0.0244683
GOTERM_BP_DIRECT	GO:0045780~positive regulation of bone resorption	3	5.17241	0.00155513	SYK, SRC, EGFR	58	20	19416	50.2138	0.870825	0.0292142	0.0267482
GOTERM_BP_DIRECT	GO:0008285~negative regulation of cell population proliferation	7	12.069	0.00168853	BCHE, AR, CDK6, NOS3, CYP1B1, NOX4, PTGS2	58	435	19416	5.38692	0.89164	0.0312735	0.0286337
GOTERM_BP_DIRECT	GO:0071391~cellular response to estrogen stimulus	3	5.17241	0.00171559	AR, ESR1, ESR2	58	21	19416	47.8227	0.895434	0.0313334	0.0286885
GOTERM_BP_DIRECT	GO:0000082~G1/S transition of mitotic cell cycle	4	6.89655	0.00174018	CCNA2, CDK6, CDK2, CDK1	58	81	19416	16.5313	0.898767	0.031347	0.028701
GOTERM_BP_DIRECT	GO:0030520~estrogen receptor signaling pathway	3	5.17241	0.0018836	AR, ESR1, ESR2	58	22	19416	45.6489	0.916195	0.0334721	0.0306467
GOTERM_BP_DIRECT	GO:0006809~nitric oxide biosynthetic process	3	5.17241	0.00205911	NOS2, NOS3, CYP1B1	58	23	19416	43.6642	0.933498	0.0351653	0.032197
GOTERM_BP_DIRECT	GO:0071168~protein localization to chromatin	3	5.17241	0.00205911	PARP1, PLK1, ESR1	58	23	19416	43.6642	0.933498	0.0351653	0.032197
GOTERM_BP_DIRECT	GO:0002223~stimulatory C-type lectin receptor signaling pathway	3	5.17241	0.00205911	IKBKB, SYK, SRC	58	23	19416	43.6642	0.933498	0.0351653	0.032197
GOTERM_BP_DIRECT	GO:0032355~response to estradiol	4	6.89655	0.00213516	CYP1B1, PTGS2, ESR1, CYP19A1	58	87	19416	15.3912	0.939839	0.035541	0.0325409
GOTERM_BP_DIRECT	GO:0030183~B cell differentiation	4	6.89655	0.00213516	ADAM17, SYK, FLT3, KIT	58	87	19416	15.3912	0.939839	0.035541	0.0325409
GOTERM_BP_DIRECT	GO:0043303~mast cell degranulation	3	5.17241	0.00243246	SYK, KIT, PIK3CG	58	25	19416	40.171	0.959343	0.0390083	0.0357156
GOTERM_BP_DIRECT	GO:0046686~response to cadmium ion	3	5.17241	0.00243246	TERT, KIT, CDK1	58	25	19416	40.171	0.959343	0.0390083	0.0357156
GOTERM_BP_DIRECT	GO:0042327~positive regulation of phosphorylation	3	5.17241	0.00243246	AR, MIF, EGFR	58	25	19416	40.171	0.959343	0.0390083	0.0357156
GOTERM_BP_DIRECT	GO:0002862~negative regulation of inflammatory response to antigenic stimulus	3	5.17241	0.00283528	SYK, SRC, MAPK14	58	27	19416	37.1954	0.976096	0.0443857	0.0406391
GOTERM_BP_DIRECT	GO:2000773~negative regulation of cellular senescence	3	5.17241	0.00283528	CDK6, TERT, MIF	58	27	19416	37.1954	0.976096	0.0443857	0.0406391
GOTERM_BP_DIRECT	GO:0001934~positive regulation of protein phosphorylation	5	8.62069	0.00297289	KDR, F2, MMP9, PTK2, EGFR	58	203	19416	8.24529	0.980063	0.0459924	0.0421102
GOTERM_BP_DIRECT	GO:0070374~positive regulation of ERK1 and ERK2 cascade	5	8.62069	0.00307935	SRC, KDR, NOX4, MIF, EGFR	58	205	19416	8.16484	0.982675	0.0470854	0.0431109
GOTERM_BP_DIRECT	GO:0007179~transforming growth factor beta receptor signaling pathway	4	6.89655	0.00344649	PARP1, SRC, PTK2, TGFBR1	58	103	19416	13.0003	0.989326	0.0520935	0.0476962
GOTERM_BP_DIRECT	GO:0010628~positive regulation of gene expression	7	12.069	0.00354938	GSK3B, AR, CDK6, NOS3, CDK1, MAPK14, TGFBR1	58	505	19416	4.64022	0.990681	0.053039	0.048562
GOTERM_BP_DIRECT	GO:0045740~positive regulation of DNA replication	3	5.17241	0.00396906	CDK2, CDK1, EGFR	58	32	19416	31.3836	0.994645	0.058644	0.0536939
GOTERM_BP_DIRECT	GO:0060045~positive regulation of cardiac muscle cell proliferation	3	5.17241	0.0042172	CDK1, PIM1, MAPK14	58	33	19416	30.4326	0.996141	0.061618	0.0564168
GOTERM_BP_DIRECT	GO:0007005~mitochondrion organization	4	6.89655	0.00446957	GSK3B, TERT, PARP1, NOS3	58	113	19416	11.8499	0.997235	0.0639257	0.0585297
GOTERM_BP_DIRECT	GO:0045824~negative regulation of innate immune response	3	5.17241	0.00447237	PARP1, PIM1, AURKB	58	34	19416	29.5375	0.997245	0.0639257	0.0585297
GOTERM_BP_DIRECT	GO:0016310~phosphorylation	3	5.17241	0.00500361	ALK, TOP1, PIK3CG	58	36	19416	27.8966	0.998635	0.07075	0.0647779
GOTERM_BP_DIRECT	GO:0006805~xenobiotic metabolic process	4	6.89655	0.00516276	BCHE, ABCC1, ABCB1, CYP1B1	58	119	19416	11.2524	0.998894	0.0715741	0.0655325
GOTERM_BP_DIRECT	GO:0051301~cell division	6	10.3448	0.00525766	CCNA2, CDK6, PLK1, CDK2, CDK1, AURKB	58	383	19416	5.24426	0.999024	0.0715741	0.0655325
GOTERM_BP_DIRECT	GO:0031100~animal organ regeneration	3	5.17241	0.00527961	CCNA2, FLT3, CDK1	58	37	19416	27.1426	0.999052	0.0715741	0.0655325
GOTERM_BP_DIRECT	GO:0043687~post-translational protein modification	3	5.17241	0.00527961	CCNA2, CDK2, AURKB	58	37	19416	27.1426	0.999052	0.0715741	0.0655325
GOTERM_BP_DIRECT	GO:0042981~regulation of apoptotic process	5	8.62069	0.00538671	ALK, FLT3, DAPK1, APEX1, MCL1	58	240	19416	6.97414	0.999177	0.0722809	0.0661796
GOTERM_BP_DIRECT	GO:0001937~negative regulation of endothelial cell proliferation	3	5.17241	0.00585215	ALOX5, XDH, TGFBR1	58	39	19416	25.7507	0.999555	0.0763348	0.0698913
GOTERM_BP_DIRECT	GO:2001237~negative regulation of extrinsic apoptotic signaling pathway	3	5.17241	0.00585215	AR, SRC, TGFBR1	58	39	19416	25.7507	0.999555	0.0763348	0.0698913
GOTERM_BP_DIRECT	GO:1905784~regulation of anaphase-promoting complex-dependent catabolic process	2	3.44828	0.00586298	PLK1, CDK2	58	2	19416	334.759	0.999562	0.0763348	0.0698913
GOTERM_BP_DIRECT	GO:2000117~negative regulation of cysteine-type endopeptidase activity	3	5.17241	0.00614861	CSNK2A1, SRC, MMP9	58	40	19416	25.1069	0.9997	0.0777445	0.071182
GOTERM_BP_DIRECT	GO:0030010~establishment of cell polarity	3	5.17241	0.00614861	GSK3B, PTK2, IGF1R	58	40	19416	25.1069	0.9997	0.0777445	0.071182
GOTERM_BP_DIRECT	GO:0043542~endothelial cell migration	3	5.17241	0.00614861	NOS3, CYP1B1, TGFBR1	58	40	19416	25.1069	0.9997	0.0777445	0.071182
GOTERM_BP_DIRECT	GO:0030574~collagen catabolic process	3	5.17241	0.00645181	MMP13, MMP3, MMP9	58	41	19416	24.4945	0.999799	0.0808012	0.0739807
GOTERM_BP_DIRECT	GO:0000122~negative regulation of transcription by RNA polymerase II	9	15.5172	0.00658911	AR, CDK6, PARP1, SRC, PLK1, CDK2, ESR1, ESR2, AURKB	58	958	19416	3.14491	0.999832	0.0817423	0.0748424
GOTERM_BP_DIRECT	GO:0018107~peptidyl-threonine phosphorylation	3	5.17241	0.0067617	GSK3B, CSNK2A1, CDK1	58	42	19416	23.9113	0.999867	0.08233	0.0753805
GOTERM_BP_DIRECT	GO:0045454~cell redox homeostasis	3	5.17241	0.0067617	NOS2, NOS3, APEX1	58	42	19416	23.9113	0.999867	0.08233	0.0753805
GOTERM_BP_DIRECT	GO:0046427~positive regulation of receptor signaling pathway via JAK-STAT	3	5.17241	0.00707826	KIT, CYP1B1, F2	58	43	19416	23.3553	0.999912	0.0846174	0.0774747
GOTERM_BP_DIRECT	GO:0042307~positive regulation of protein import into nucleus	3	5.17241	0.00707826	CDK1, MAPK14, PTGS2	58	43	19416	23.3553	0.999912	0.0846174	0.0774747
GOTERM_BP_DIRECT	GO:0048870~cell motility	3	5.17241	0.00740143	ADAM17, PTK2, TGFBR1	58	44	19416	22.8245	0.999943	0.0876836	0.0802822
GOTERM_BP_DIRECT	GO:0006954~inflammatory response	6	10.3448	0.00800546	IKBKB, NOS2, KIT, NOX4, MIF, PIK3CG	58	424	19416	4.73715	0.999974	0.0932209	0.085352
GOTERM_BP_DIRECT	GO:0022617~extracellular matrix disassembly	3	5.17241	0.00806746	MMP13, MMP3, MMP9	58	46	19416	21.8321	0.999976	0.0932209	0.085352
GOTERM_BP_DIRECT	GO:0008360~regulation of cell shape	4	6.89655	0.0080815	KIT, KDR, F2, PTK2	58	140	19416	9.56453	0.999977	0.0932209	0.085352
GOTERM_BP_DIRECT	GO:0071456~cellular response to hypoxia	4	6.89655	0.00840075	CCNA2, TERT, SRC, PTGS2	58	142	19416	9.42982	0.999985	0.0960607	0.0879522
GOTERM_BP_DIRECT	GO:0062033~positive regulation of mitotic sister chromatid segregation	2	3.44828	0.00878179	CDK1, AURKB	58	3	19416	223.172	0.999991	0.0995522	0.0911489
GOTERM_BP_DIRECT	GO:0043406~positive regulation of MAP kinase activity	3	5.17241	0.00911513	FLT3, EGFR, PIK3CG	58	49	19416	20.4954	0.999994	0.102448	0.0938001
GOTERM_BP_DIRECT	GO:0043536~positive regulation of blood vessel endothelial cell migration	3	5.17241	0.00947716	ADAM17, NOS3, KDR	58	50	19416	20.0855	0.999996	0.104727	0.0958866
GOTERM_BP_DIRECT	GO:0045747~positive regulation of Notch signaling pathway	3	5.17241	0.00947716	SRC, NOS3, KIT	58	50	19416	20.0855	0.999996	0.104727	0.0958866
GOTERM_BP_DIRECT	GO:0031334~positive regulation of protein-containing complex assembly	3	5.17241	0.0102202	GSK3B, SYK, MMP3	58	52	19416	19.313	0.999999	0.111996	0.102543
GOTERM_BP_DIRECT	GO:0048863~stem cell differentiation	3	5.17241	0.0106011	KIT, MAPK14, ESR1	58	53	19416	18.9486	0.999999	0.113337	0.103771
GOTERM_BP_DIRECT	GO:1904707~positive regulation of vascular associated smooth muscle cell proliferation	3	5.17241	0.0106011	TERT, SRC, MMP9	58	53	19416	18.9486	0.999999	0.113337	0.103771
GOTERM_BP_DIRECT	GO:1900087~positive regulation of G1/S transition of mitotic cell cycle	3	5.17241	0.0106011	ADAM17, TERT, EGFR	58	53	19416	18.9486	0.999999	0.113337	0.103771
GOTERM_BP_DIRECT	GO:0048661~positive regulation of smooth muscle cell proliferation	3	5.17241	0.0109883	PTGS2, EGFR, IGF1R	58	54	19416	18.5977	1	0.115597	0.105839
GOTERM_BP_DIRECT	GO:1904263~positive regulation of TORC1 signaling	3	5.17241	0.0109883	SYK, SRC, PIM1	58	54	19416	18.5977	1	0.115597	0.105839
GOTERM_BP_DIRECT	GO:0032765~positive regulation of mast cell cytokine production	2	3.44828	0.0116922	SYK, KIT	58	4	19416	167.379	1	0.121065	0.110846
GOTERM_BP_DIRECT	GO:0060571~morphogenesis of an epithelial fold	2	3.44828	0.0116922	AR, EGFR	58	4	19416	167.379	1	0.121065	0.110846
GOTERM_BP_DIRECT	GO:0045766~positive regulation of angiogenesis	4	6.89655	0.0124048	TERT, NOS3, KDR, CYP1B1	58	164	19416	8.16484	1	0.12744	0.116682
GOTERM_BP_DIRECT	GO:0000723~telomere maintenance	3	5.17241	0.0134398	TERT, PARP1, APEX1	58	60	19416	16.7379	1	0.137002	0.125438
GOTERM_BP_DIRECT	GO:1902895~positive regulation of miRNA transcription	3	5.17241	0.014305	AR, TERT, EGFR	58	62	19416	16.198	1	0.144701	0.132486
GOTERM_BP_DIRECT	GO:0071373~cellular response to luteinizing hormone stimulus	2	3.44828	0.0145942	CCNA2, CYP1B1	58	5	19416	133.903	1	0.145389	0.133117
GOTERM_BP_DIRECT	GO:0032310~prostaglandin secretion	2	3.44828	0.0145942	NOS2, PTGS2	58	5	19416	133.903	1	0.145389	0.133117
GOTERM_BP_DIRECT	GO:0030097~hemopoiesis	3	5.17241	0.0161057	FLT3, LCK, KIT	58	66	19416	15.2163	1	0.159241	0.145799
GOTERM_BP_DIRECT	GO:0001819~positive regulation of cytokine production	3	5.17241	0.0170407	SRC, MIF, PIK3CG	58	68	19416	14.7688	1	0.165715	0.151727
GOTERM_BP_DIRECT	GO:0007346~regulation of mitotic cell cycle	3	5.17241	0.0170407	PLK1, CDK2, PIM1	58	68	19416	14.7688	1	0.165715	0.151727
GOTERM_BP_DIRECT	GO:0051712~positive regulation of killing of cells of another organism	2	3.44828	0.0174878	SYK, NOS2	58	6	19416	111.586	1	0.165715	0.151727
GOTERM_BP_DIRECT	GO:1990962~xenobiotic transport across blood-brain barrier	2	3.44828	0.0174878	ABCC1, ABCB1	58	6	19416	111.586	1	0.165715	0.151727
GOTERM_BP_DIRECT	GO:0010632~regulation of epithelial cell migration	2	3.44828	0.0174878	SRC, PTK2	58	6	19416	111.586	1	0.165715	0.151727
GOTERM_BP_DIRECT	GO:0070301~cellular response to hydrogen peroxide	3	5.17241	0.0175166	SRC, CDK1, CYP1B1	58	69	19416	14.5547	1	0.165715	0.151727
GOTERM_BP_DIRECT	GO:0030336~negative regulation of cell migration	4	6.89655	0.0178314	GSK3B, CYP1B1, MIF, TGFBR1	58	188	19416	7.12252	1	0.167488	0.15335
GOTERM_BP_DIRECT	GO:0033138~positive regulation of peptidyl-serine phosphorylation	3	5.17241	0.0179982	MIF, PTGS2, EGFR	58	70	19416	14.3468	1	0.167856	0.153687
GOTERM_BP_DIRECT	GO:0021766~hippocampus development	3	5.17241	0.0189782	ALK, GSK3B, IGF1R	58	72	19416	13.9483	1	0.175748	0.160913
GOTERM_BP_DIRECT	GO:0007166~cell surface receptor signaling pathway	5	8.62069	0.019567	MIF, F2, MAPK14, MET, EGFR	58	351	19416	4.76864	1	0.179934	0.164746
GOTERM_BP_DIRECT	GO:0060736~prostate gland growth	2	3.44828	0.0203731	AR, CYP19A1	58	7	19416	95.6453	1	0.182249	0.166865
GOTERM_BP_DIRECT	GO:1905039~carboxylic acid transmembrane transport	2	3.44828	0.0203731	ABCC1, ABCB1	58	7	19416	95.6453	1	0.182249	0.166865
GOTERM_BP_DIRECT	GO:0051902~negative regulation of mitochondrial depolarization	2	3.44828	0.0203731	SRC, ALB	58	7	19416	95.6453	1	0.182249	0.166865
GOTERM_BP_DIRECT	GO:0002318~myeloid progenitor cell differentiation	2	3.44828	0.0203731	FLT3, KIT	58	7	19416	95.6453	1	0.182249	0.166865
GOTERM_BP_DIRECT	GO:0071260~cellular response to mechanical stimulus	3	5.17241	0.021004	PTGS2, EGFR, IGF1R	58	76	19416	13.2142	1	0.186623	0.17087
GOTERM_BP_DIRECT	GO:0071346~cellular response to type II interferon	3	5.17241	0.0220493	NOS2, DAPK1, PIM1	58	78	19416	12.8753	1	0.192019	0.17581
GOTERM_BP_DIRECT	GO:0048511~rhythmic process	3	5.17241	0.0220493	CSNK2A1, CDK1, TOP1	58	78	19416	12.8753	1	0.192019	0.17581
GOTERM_BP_DIRECT	GO:2001056~positive regulation of cysteine-type endopeptidase activity	3	5.17241	0.0220493	DAPK1, LCK, XDH	58	78	19416	12.8753	1	0.192019	0.17581
GOTERM_BP_DIRECT	GO:0006302~double-strand break repair	3	5.17241	0.0225799	CSNK2A1, PARP1, PLK1	58	79	19416	12.7124	1	0.195346	0.178857
GOTERM_BP_DIRECT	GO:0010760~negative regulation of macrophage chemotaxis	2	3.44828	0.02325	MIF, CYP19A1	58	8	19416	83.6897	1	0.195986	0.179443
GOTERM_BP_DIRECT	GO:0007172~signal complex assembly	2	3.44828	0.02325	SRC, PTK2	58	8	19416	83.6897	1	0.195986	0.179443
GOTERM_BP_DIRECT	GO:0007077~mitotic nuclear membrane disassembly	2	3.44828	0.02325	PLK1, CDK1	58	8	19416	83.6897	1	0.195986	0.179443
GOTERM_BP_DIRECT	GO:0010544~negative regulation of platelet activation	2	3.44828	0.02325	NOS3, F2	58	8	19416	83.6897	1	0.195986	0.179443
GOTERM_BP_DIRECT	GO:0050731~positive regulation of peptidyl-tyrosine phosphorylation	3	5.17241	0.0253116	SYK, SRC, MIF	58	84	19416	11.9557	1	0.212005	0.194109
GOTERM_BP_DIRECT	GO:0008354~germ cell migration	2	3.44828	0.0261187	KIT, TGFBR1	58	9	19416	74.3908	1	0.214663	0.196543
GOTERM_BP_DIRECT	GO:1990314~cellular response to insulin-like growth factor stimulus	2	3.44828	0.0261187	CCNA2, IGF1R	58	9	19416	74.3908	1	0.214663	0.196543
GOTERM_BP_DIRECT	GO:0051901~positive regulation of mitochondrial depolarization	2	3.44828	0.0261187	PARP1, KDR	58	9	19416	74.3908	1	0.214663	0.196543
GOTERM_BP_DIRECT	GO:0051091~positive regulation of DNA-binding transcription factor activity	3	5.17241	0.0281708	KIT, ESR1, ESR2	58	89	19416	11.284	1	0.224161	0.20524
GOTERM_BP_DIRECT	GO:0045944~positive regulation of transcription by RNA polymerase II	9	15.5172	0.0282661	IKBKB, AR, PARP1, APEX1, MAPK14, ESR1, MET, EGFR, ESR2	58	1246	19416	2.418	1	0.224161	0.20524
GOTERM_BP_DIRECT	GO:0140115~export across plasma membrane	2	3.44828	0.028979	ABCC1, ABCB1	58	10	19416	66.9517	1	0.224161	0.20524
GOTERM_BP_DIRECT	GO:0001945~lymph vessel development	2	3.44828	0.028979	SYK, KDR	58	10	19416	66.9517	1	0.224161	0.20524
GOTERM_BP_DIRECT	GO:0071394~cellular response to testosterone stimulus	2	3.44828	0.028979	AR, IGF1R	58	10	19416	66.9517	1	0.224161	0.20524
GOTERM_BP_DIRECT	GO:0043586~tongue development	2	3.44828	0.028979	KIT, EGFR	58	10	19416	66.9517	1	0.224161	0.20524
GOTERM_BP_DIRECT	GO:0070633~transepithelial transport	2	3.44828	0.028979	ABCC1, ABCB1	58	10	19416	66.9517	1	0.224161	0.20524
GOTERM_BP_DIRECT	GO:0009624~response to nematode	2	3.44828	0.028979	ARG1, PTGS2	58	10	19416	66.9517	1	0.224161	0.20524
GOTERM_BP_DIRECT	GO:0033148~positive regulation of intracellular estrogen receptor signaling pathway	2	3.44828	0.028979	AR, PARP1	58	10	19416	66.9517	1	0.224161	0.20524
GOTERM_BP_DIRECT	GO:0051093~negative regulation of developmental process	2	3.44828	0.028979	GSK3B, KIT	58	10	19416	66.9517	1	0.224161	0.20524
GOTERM_BP_DIRECT	GO:0034501~protein localization to kinetochore	2	3.44828	0.0318312	CDK1, AURKB	58	11	19416	60.8652	1	0.236486	0.216524
GOTERM_BP_DIRECT	GO:0071492~cellular response to UV-A	2	3.44828	0.0318312	MMP3, MMP9	58	11	19416	60.8652	1	0.236486	0.216524
GOTERM_BP_DIRECT	GO:0051239~regulation of multicellular organismal process	2	3.44828	0.0318312	PTK2, TGFBR1	58	11	19416	60.8652	1	0.236486	0.216524
GOTERM_BP_DIRECT	GO:0043279~response to alkaloid	2	3.44828	0.0318312	BCHE, IGF1R	58	11	19416	60.8652	1	0.236486	0.216524
GOTERM_BP_DIRECT	GO:0051926~negative regulation of calcium ion transport	2	3.44828	0.0318312	NOS3, PTGS2	58	11	19416	60.8652	1	0.236486	0.216524
GOTERM_BP_DIRECT	GO:0019370~leukotriene biosynthetic process	2	3.44828	0.0318312	SYK, ALOX5	58	11	19416	60.8652	1	0.236486	0.216524
GOTERM_BP_DIRECT	GO:0045056~transcytosis	2	3.44828	0.0318312	SRC, IGF1R	58	11	19416	60.8652	1	0.236486	0.216524
GOTERM_BP_DIRECT	GO:0051726~regulation of cell cycle	4	6.89655	0.0331275	CDK6, CSNK2A1, PLK1, TGFBR1	58	239	19416	5.60265	1	0.244734	0.224076
GOTERM_BP_DIRECT	GO:0006366~transcription by RNA polymerase II	4	6.89655	0.0334786	AR, PARP1, MAPK14, ESR1	58	240	19416	5.57931	1	0.245946	0.225186
GOTERM_BP_DIRECT	GO:0034121~regulation of toll-like receptor signaling pathway	2	3.44828	0.0346751	IKBKB, ESR1	58	12	19416	55.7931	1	0.249168	0.228135
GOTERM_BP_DIRECT	GO:0007263~nitric oxide mediated signal transduction	2	3.44828	0.0346751	NOS2, NOS3	58	12	19416	55.7931	1	0.249168	0.228135
GOTERM_BP_DIRECT	GO:0010389~regulation of G2/M transition of mitotic cell cycle	2	3.44828	0.0346751	CDK6, CDK2	58	12	19416	55.7931	1	0.249168	0.228135
GOTERM_BP_DIRECT	GO:0030518~nuclear receptor-mediated steroid hormone signaling pathway	2	3.44828	0.0346751	AR, ESR1	58	12	19416	55.7931	1	0.249168	0.228135
GOTERM_BP_DIRECT	GO:0050727~regulation of inflammatory response	3	5.17241	0.0361725	ALOX5, PTGS2, ESR1	58	102	19416	9.84584	1	0.258515	0.236694
GOTERM_BP_DIRECT	GO:0033628~regulation of cell adhesion mediated by integrin	2	3.44828	0.0375107	PTK2, PIK3CG	58	13	19416	51.5013	1	0.26663	0.244124
GOTERM_BP_DIRECT	GO:0046718~symbiont entry into host cell	3	5.17241	0.0394572	SRC, CDK1, EGFR	58	107	19416	9.38576	1	0.278958	0.255411
GOTERM_BP_DIRECT	GO:0071498~cellular response to fluid shear stress	2	3.44828	0.0403382	SRC, PTGS2	58	14	19416	47.8227	1	0.28066	0.256969
GOTERM_BP_DIRECT	GO:0010269~response to selenium ion	2	3.44828	0.0403382	MAOB, PTGS2	58	14	19416	47.8227	1	0.28066	0.256969
GOTERM_BP_DIRECT	GO:2001028~positive regulation of endothelial cell chemotaxis	2	3.44828	0.0403382	KDR, MET	58	14	19416	47.8227	1	0.28066	0.256969
GOTERM_BP_DIRECT	GO:0006260~DNA replication	3	5.17241	0.0408019	CDK2, CDK1, TOP1	58	109	19416	9.21354	1	0.280914	0.257202
GOTERM_BP_DIRECT	GO:0007229~integrin-mediated signaling pathway	3	5.17241	0.0408019	SYK, SRC, PTK2	58	109	19416	9.21354	1	0.280914	0.257202
GOTERM_BP_DIRECT	GO:0009615~response to virus	3	5.17241	0.0414808	IKBKB, CDK6, ODC1	58	110	19416	9.12978	1	0.2841	0.260119
GOTERM_BP_DIRECT	GO:0071356~cellular response to tumor necrosis factor	3	5.17241	0.0421639	IKBKB, CYP1B1, MAPK14	58	111	19416	9.04753	1	0.287282	0.263033
GOTERM_BP_DIRECT	GO:0045471~response to ethanol	3	5.17241	0.0428512	MAOB, CDK1, IGF1R	58	112	19416	8.96675	1	0.289552	0.265111
GOTERM_BP_DIRECT	GO:0051000~positive regulation of nitric-oxide synthase activity	2	3.44828	0.0431576	TERT, ESR1	58	15	19416	44.6345	1	0.289552	0.265111
GOTERM_BP_DIRECT	GO:0006950~response to stress	2	3.44828	0.0431576	ALK, MCL1	58	15	19416	44.6345	1	0.289552	0.265111
GOTERM_BP_DIRECT	GO:0032760~positive regulation of tumor necrosis factor production	3	5.17241	0.0442385	ADAM17, SYK, MIF	58	114	19416	8.80944	1	0.295298	0.270371
GOTERM_BP_DIRECT	GO:0160049~negative regulation of cGAS/STING signaling pathway	2	3.44828	0.0459688	PARP1, AURKB	58	16	19416	41.8448	1	0.305298	0.279527
GOTERM_BP_DIRECT	GO:0006691~leukotriene metabolic process	2	3.44828	0.0487718	ABCC1, ALOX5	58	17	19416	39.3834	1	0.3175	0.290699
GOTERM_BP_DIRECT	GO:0035162~embryonic hemopoiesis	2	3.44828	0.0487718	KIT, KDR	58	17	19416	39.3834	1	0.3175	0.290699
GOTERM_BP_DIRECT	GO:0097242~amyloid-beta clearance	2	3.44828	0.0487718	SYK, IGF1R	58	17	19416	39.3834	1	0.3175	0.290699
GOTERM_BP_DIRECT	GO:0044849~estrous cycle	2	3.44828	0.0487718	CYP1B1, IGF1R	58	17	19416	39.3834	1	0.3175	0.290699
GOTERM_BP_DIRECT	GO:0051092~positive regulation of NF-kappaB transcription factor activity	3	5.17241	0.0499517	ALK, IKBKB, AR	58	122	19416	8.23177	1	0.323579	0.296265
GOTERM_BP_DIRECT	GO:0060749~mammary gland alveolus development	2	3.44828	0.0515668	AR, ESR1	58	18	19416	37.1954	1	0.332404	0.304345
GOTERM_BP_DIRECT	GO:0006281~DNA repair	4	6.89655	0.0534847	PARP1, APEX1, CDK2, CDK1	58	290	19416	4.61736	1	0.343085	0.314125
GOTERM_BP_DIRECT	GO:0046328~regulation of JNK cascade	2	3.44828	0.0543538	EGFR, IGF1R	58	19	19416	35.2377	1	0.343631	0.314625
GOTERM_BP_DIRECT	GO:0048514~blood vessel morphogenesis	2	3.44828	0.0543538	SYK, CYP1B1	58	19	19416	35.2377	1	0.343631	0.314625
GOTERM_BP_DIRECT	GO:0033280~response to vitamin D	2	3.44828	0.0543538	TYR, PTGS2	58	19	19416	35.2377	1	0.343631	0.314625
GOTERM_BP_DIRECT	GO:0001516~prostaglandin biosynthetic process	2	3.44828	0.0571326	MIF, PTGS2	58	20	19416	33.4759	1	0.357759	0.32756
GOTERM_BP_DIRECT	GO:0006801~superoxide metabolic process	2	3.44828	0.0571326	NOS2, NOX4	58	20	19416	33.4759	1	0.357759	0.32756
GOTERM_BP_DIRECT	GO:0016125~sterol metabolic process	2	3.44828	0.0599035	CYP1B1, CYP19A1	58	21	19416	31.8818	1	0.369827	0.338609
GOTERM_BP_DIRECT	GO:0032930~positive regulation of superoxide anion generation	2	3.44828	0.0599035	SYK, EGFR	58	21	19416	31.8818	1	0.369827	0.338609
GOTERM_BP_DIRECT	GO:0014911~positive regulation of smooth muscle cell migration	2	3.44828	0.0599035	SRC, CYP1B1	58	21	19416	31.8818	1	0.369827	0.338609
GOTERM_BP_DIRECT	GO:0010803~regulation of tumor necrosis factor-mediated signaling pathway	2	3.44828	0.0626663	IKBKB, SYK	58	22	19416	30.4326	1	0.383285	0.350931
GOTERM_BP_DIRECT	GO:0043473~pigmentation	2	3.44828	0.0626663	KIT, TYR	58	22	19416	30.4326	1	0.383285	0.350931
GOTERM_BP_DIRECT	GO:0006974~DNA damage response	4	6.89655	0.0637572	CSNK2A1, PARP1, CDK1, MCL1	58	312	19416	4.29178	1	0.388151	0.355387
GOTERM_BP_DIRECT	GO:2001243~negative regulation of intrinsic apoptotic signaling pathway	2	3.44828	0.0654212	SRC, MMP9	58	23	19416	29.1094	1	0.396446	0.362982
GOTERM_BP_DIRECT	GO:0051403~stress-activated MAPK cascade	2	3.44828	0.0681681	IKBKB, MAPK14	58	24	19416	27.8966	1	0.407459	0.373066
GOTERM_BP_DIRECT	GO:0038095~Fc-epsilon receptor signaling pathway	2	3.44828	0.0681681	IKBKB, SYK	58	24	19416	27.8966	1	0.407459	0.373066
GOTERM_BP_DIRECT	GO:0035331~negative regulation of hippo signaling	2	3.44828	0.0681681	SRC, MAPK14	58	24	19416	27.8966	1	0.407459	0.373066
GOTERM_BP_DIRECT	GO:0046697~decidualization	2	3.44828	0.0709071	PARP1, PTGS2	58	25	19416	26.7807	1	0.420013	0.384559
GOTERM_BP_DIRECT	GO:0036120~cellular response to platelet-derived growth factor stimulus	2	3.44828	0.0709071	CCNA2, SRC	58	25	19416	26.7807	1	0.420013	0.384559
GOTERM_BP_DIRECT	GO:0045332~phospholipid translocation	2	3.44828	0.0736382	ABCC1, ABCB1	58	26	19416	25.7507	1	0.430374	0.394046
GOTERM_BP_DIRECT	GO:0001954~positive regulation of cell-matrix adhesion	2	3.44828	0.0736382	GSK3B, CDK6	58	26	19416	25.7507	1	0.430374	0.394046
GOTERM_BP_DIRECT	GO:0050900~leukocyte migration	2	3.44828	0.0736382	SRC, LCK	58	26	19416	25.7507	1	0.430374	0.394046
GOTERM_BP_DIRECT	GO:2000042~negative regulation of double-strand break repair via homologous recombination	2	3.44828	0.0763614	CSNK2A1, PLK1	58	27	19416	24.7969	1	0.444315	0.40681
GOTERM_BP_DIRECT	GO:0045742~positive regulation of epidermal growth factor receptor signaling pathway	2	3.44828	0.0817842	ADAM17, MMP9	58	29	19416	23.0868	1	0.467592	0.428122
GOTERM_BP_DIRECT	GO:0045776~negative regulation of blood pressure	2	3.44828	0.0817842	NOS2, NOS3	58	29	19416	23.0868	1	0.467592	0.428122
GOTERM_BP_DIRECT	GO:1902042~negative regulation of extrinsic apoptotic signaling pathway via death domain receptors	2	3.44828	0.0817842	GSK3B, NOS3	58	29	19416	23.0868	1	0.467592	0.428122
GOTERM_BP_DIRECT	GO:0045453~bone resorption	2	3.44828	0.0817842	SRC, NOX4	58	29	19416	23.0868	1	0.467592	0.428122
GOTERM_BP_DIRECT	GO:0071897~DNA biosynthetic process	2	3.44828	0.0844838	TERT, SRC	58	30	19416	22.3172	1	0.476808	0.43656
GOTERM_BP_DIRECT	GO:0071549~cellular response to dexamethasone stimulus	2	3.44828	0.0844838	EGFR, IGF1R	58	30	19416	22.3172	1	0.476808	0.43656
GOTERM_BP_DIRECT	GO:0071902~positive regulation of protein serine/threonine kinase activity	2	3.44828	0.0844838	SRC, PIM1	58	30	19416	22.3172	1	0.476808	0.43656
GOTERM_BP_DIRECT	GO:0045907~positive regulation of vasoconstriction	2	3.44828	0.0871757	PTGS2, EGFR	58	31	19416	21.5973	1	0.488245	0.447031
GOTERM_BP_DIRECT	GO:0030198~extracellular matrix organization	3	5.17241	0.0872528	MMP13, MMP3, MMP9	58	168	19416	5.97783	1	0.488245	0.447031
GOTERM_BP_DIRECT	GO:0070372~regulation of ERK1 and ERK2 cascade	2	3.44828	0.0898598	SYK, EGFR	58	32	19416	20.9224	1	0.498589	0.456503
GOTERM_BP_DIRECT	GO:0010575~positive regulation of vascular endothelial growth factor production	2	3.44828	0.0898598	CYP1B1, PTGS2	58	32	19416	20.9224	1	0.498589	0.456503
GOTERM_BP_DIRECT	GO:0051968~positive regulation of synaptic transmission, glutamatergic	2	3.44828	0.0925361	PTGS2, EGFR	58	33	19416	20.2884	1	0.509142	0.466165
GOTERM_BP_DIRECT	GO:0035924~cellular response to vascular endothelial growth factor stimulus	2	3.44828	0.0925361	KDR, MAPK14	58	33	19416	20.2884	1	0.509142	0.466165
GOTERM_BP_DIRECT	GO:0006508~proteolysis	5	8.62069	0.0929595	ADAM17, MMP13, MMP3, F2, MMP9	58	586	19416	2.8563	1	0.509341	0.466347
GOTERM_BP_DIRECT	GO:0071345~cellular response to cytokine stimulus	2	3.44828	0.0952047	FLT3, DAPK1	58	34	19416	19.6917	1	0.517331	0.473663
GOTERM_BP_DIRECT	GO:0097192~extrinsic apoptotic signaling pathway in absence of ligand	2	3.44828	0.0952047	GSK3B, MCL1	58	34	19416	19.6917	1	0.517331	0.473663
GOTERM_BP_DIRECT	GO:0071276~cellular response to cadmium ion	2	3.44828	0.0978656	MMP9, EGFR	58	35	19416	19.1291	1	0.529602	0.484898

## Sheet: CC
Table SIII. GO enrichment analysis.
Category	Term	Count	%	PValue	Genes	List Total	Pop Hits	Pop Total	Fold Enrichment	Bonferroni	Benjamini	FDR
GOTERM_CC_DIRECT	GO:0043235~receptor complex	9	15.5172	1.3315e-07	ALK, FLT3, SRC, KIT, KDR, MET, EGFR, TGFBR1, IGF1R	58	216	20666	14.8463	2.52982e-05	2.52985e-05	2.3035e-05
GOTERM_CC_DIRECT	GO:0005829~cytosol	32	55.1724	1.08844e-05	GSK3B, PFKFB3, SRC, ODC1, PIK3CG, AURKB, IKBKB, TERT, ALOX5, PIM1, XDH, MCL1, SYK, PARP1, NOS2, CSNK2A1, NOS3, ARG1, MMP3, PLK1, MIF, MAPK14, ESR1, PTK2, CCNA2, AR, ADAM17, PDE10A, CDK6, LCK, CDK2, CDK1	58	5576	20666	2.04482	0.0020659	0.00103401	0.000941497
GOTERM_CC_DIRECT	GO:0045121~membrane raft	7	12.069	2.68567e-05	IKBKB, ADAM17, SRC, LCK, KDR, EGFR, TGFBR1	58	214	20666	11.655	0.00508984	0.00170092	0.00154873
GOTERM_CC_DIRECT	GO:0005737~cytoplasm	31	53.4483	0.000105415	GSK3B, ABCB1, SRC, ODC1, PTGS2, EGFR, PIK3CG, IKBKB, TERT, PIM1, MCL1, SYK, NOS2, DAPK1, NOS3, ARG1, PLK1, MIF, TYR, MAPK14, ESR1, PTK2, CCNA2, AR, ADAM17, CDK6, LCK, APEX1, ALB, CDK2, CDK1	58	5887	20666	1.87627	0.0198307	0.00500722	0.0045592
GOTERM_CC_DIRECT	GO:0005634~nucleus	31	53.4483	0.000239909	GSK3B, EGFR, AURKB, IKBKB, TERT, KDR, PIM1, MCL1, SYK, PARP1, NOS2, CSNK2A1, DAPK1, NOS3, ARG1, MMP3, PLK1, MAPK14, ESR1, TGFBR1, PTK2, ESR2, CCNA2, AR, CDK6, APEX1, ALB, CDK2, CDK1, NOX4, TOP1	58	6138	20666	1.79955	0.0445647	0.00705731	0.00642587
GOTERM_CC_DIRECT	GO:0005886~plasma membrane	29	50	0.000257237	ALK, GSK3B, ABCB1, FLT3, SRC, EGFR, PIK3CG, IGF1R, TERT, KDR, PIM1, BCHE, ABCC1, SYK, NOS2, CSNK2A1, DAPK1, NOS3, MIF, F2, ESR1, TGFBR1, PTK2, AR, ADAM17, LCK, KIT, NOX4, MET	58	5534	20666	1.86718	0.0477058	0.00705731	0.00642587
GOTERM_CC_DIRECT	GO:0000307~cyclin-dependent protein kinase holoenzyme complex	4	6.89655	0.000260006	CCNA2, CDK6, CDK2, CDK1	58	45	20666	31.672	0.0482069	0.00705731	0.00642587
GOTERM_CC_DIRECT	GO:0005813~centrosome	9	15.5172	0.000434938	CCNA2, GSK3B, CDK6, APEX1, PLK1, CDK2, CDK1, PTK2, AURKB	58	661	20666	4.85143	0.0793324	0.0103298	0.00940553
GOTERM_CC_DIRECT	GO:0005654~nucleoplasm	23	39.6552	0.000580092	GSK3B, PFKFB3, NOS2, PARP1, CSNK2A1, SRC, PLK1, MIF, MAPK14, ESR1, ESR2, AURKB, CCNA2, AR, CDK6, TERT, APEX1, ALOX5, CDK2, PIM1, CDK1, TOP1, MCL1	58	4000	20666	2.04878	0.104389	0.0122464	0.0111507
GOTERM_CC_DIRECT	GO:0005901~caveola	4	6.89655	0.00116692	SRC, NOS3, PTGS2, IGF1R	58	75	20666	19.0032	0.19896	0.0221714	0.0201877
TOP 10
GOTERM_CC_DIRECT	GO:0000781~chromosome, telomeric region	5	8.62069	0.00135453	TERT, PARP1, APEX1, CDK2, CDK1	58	174	20666	10.2388	0.227045	0.0233964	0.021303
GOTERM_CC_DIRECT	GO:0005788~endoplasmic reticulum lumen	6	10.3448	0.00167361	BCHE, ADAM17, FLT3, ALB, F2, PTGS2	58	312	20666	6.85212	0.27258	0.0264988	0.0241278
GOTERM_CC_DIRECT	GO:0032991~protein-containing complex	8	13.7931	0.00282894	ALK, AR, SYK, PARP1, ALB, PTGS2, ESR1, EGFR	58	692	20666	4.11919	0.416237	0.041346	0.0376467
GOTERM_CC_DIRECT	GO:0048471~perinuclear region of cytoplasm	8	13.7931	0.00463171	NOS2, SRC, ALOX5, APEX1, NOX4, TYR, PTK2, EGFR	58	757	20666	3.7655	0.586075	0.0615693	0.0560605
GOTERM_CC_DIRECT	GO:1904813~ficolin-1-rich granule lumen	4	6.89655	0.00498258	ALOX5, MIF, MAPK14, MMP9	58	125	20666	11.4019	0.612894	0.0615693	0.0560605
GOTERM_CC_DIRECT	GO:0005876~spindle microtubule	3	5.17241	0.00545077	PLK1, CDK1, AURKB	58	40	20666	26.7233	0.646007	0.0615693	0.0560605
GOTERM_CC_DIRECT	GO:0097122~cyclin A2-CDK1 complex	2	3.44828	0.00550883	CCNA2, CDK1	58	2	20666	356.31	0.649912	0.0615693	0.0560605
GOTERM_CC_DIRECT	GO:0005739~mitochondrion	12	20.6897	0.0064136	GSK3B, MAOB, PARP1, SRC, APEX1, MMP3, CDK1, CYP1B1, NOX4, MAPK14, ESR2, MCL1	58	1711	20666	2.49896	0.705509	0.0676991	0.0616418
GOTERM_CC_DIRECT	GO:0005615~extracellular space	13	22.4138	0.00709731	BCHE, ARG1, MMP3, MIF, F2, MMP9, EGFR, MMP13, TTR, ALOX5, KIT, ALB, XDH	58	1986	20666	2.33234	0.741613	0.0709731	0.0646229
GOTERM_CC_DIRECT	GO:0097124~cyclin A2-CDK2 complex	2	3.44828	0.00825206	CCNA2, CDK2	58	3	20666	237.54	0.792867	0.0783945	0.0713803
GOTERM_CC_DIRECT	GO:0009925~basal plasma membrane	3	5.17241	0.0168846	ABCC1, MET, EGFR	58	72	20666	14.8463	0.960658	0.152766	0.139097
GOTERM_CC_DIRECT	GO:0005576~extracellular region	13	22.4138	0.0180252	BCHE, ARG1, MMP3, MIF, F2, MAPK14, MMP9, MMP13, TTR, ALOX5, ALB, KDR, MET	58	2248	20666	2.06051	0.968445	0.155672	0.141744
GOTERM_CC_DIRECT	GO:0098978~glutamatergic synapse	6	10.3448	0.0229378	GSK3B, PDE10A, SRC, DAPK1, MAPK14, EGFR	58	589	20666	3.62965	0.987832	0.189486	0.172532
GOTERM_CC_DIRECT	GO:0005641~nuclear envelope lumen	2	3.44828	0.0299319	BCHE, ALOX5	58	11	20666	64.7837	0.996892	0.23537	0.21431
GOTERM_CC_DIRECT	GO:0005925~focal adhesion	5	8.62069	0.0309697	ADAM17, SRC, NOX4, PTK2, EGFR	58	431	20666	4.13353	0.997464	0.23537	0.21431
GOTERM_CC_DIRECT	GO:0032587~ruffle membrane	3	5.17241	0.0322892	ADAM17, SRC, EGFR	58	102	20666	10.4797	0.998043	0.235959	0.214847
GOTERM_CC_DIRECT	GO:0009986~cell surface	6	10.3448	0.0360545	ADAM17, ABCB1, MIF, MET, EGFR, TGFBR1	58	665	20666	3.21483	0.999067	0.253717	0.231016
GOTERM_CC_DIRECT	GO:0034774~secretory granule lumen	3	5.17241	0.040805	ALOX5, MIF, MAPK14	58	116	20666	9.21492	0.999635	0.276891	0.252117
GOTERM_CC_DIRECT	GO:0016020~membrane	22	37.931	0.0556934	ALK, ABCC1, ABCB1, SYK, PARP1, FLT3, ESR1, CYP19A1, EGFR, TGFBR1, PIK3CG, PTK2, IGF1R, AR, ADAM17, MMP13, KIT, CDK1, CYP1B1, NOX4, MET, MCL1	58	5475	20666	1.43175	0.999981	0.3641	0.331523
GOTERM_CC_DIRECT	GO:0005768~endosome	4	6.89655	0.0574895	CDK2, KDR, EGFR, TGFBR1	58	318	20666	4.48189	0.999987	0.3641	0.331523
GOTERM_CC_DIRECT	GO:0000922~spindle pole	3	5.17241	0.0614772	PLK1, MAPK14, AURKB	58	146	20666	7.32145	0.999994	0.376796	0.343083
GOTERM_CC_DIRECT	GO:0072562~blood microparticle	3	5.17241	0.0784443	BCHE, ALB, F2	58	168	20666	6.36268	1	0.458146	0.417154
GOTERM_CC_DIRECT	GO:0051233~spindle midzone	2	3.44828	0.0795726	PLK1, AURKB	58	30	20666	23.754	1	0.458146	0.417154
GOTERM_CC_DIRECT	GO:0070062~extracellular exosome	11	18.9655	0.0846642	ALK, ABCC1, ABCB1, TTR, SRC, LCK, ALB, CDK1, MIF, F2, MMP9	58	2242	20666	1.74818	1	0.473124	0.430791
GOTERM_CC_DIRECT	GO:0030054~cell junction	3	5.17241	0.0984018	SRC, KDR, EGFR	58	192	20666	5.56735	1	0.50092	0.456101
GOTERM_CC_DIRECT	GO:0030496~midbody	3	5.17241	0.0992623	PLK1, CDK1, AURKB	58	193	20666	5.5385	1	0.50092	0.456101

## Sheet: MF
Table SIII. GO enrichment analysis.
Category	Term	Count	%	PValue	Genes	List Total	Pop Hits	Pop Total	Fold Enrichment	Bonferroni	Benjamini	FDR
GOTERM_MF_DIRECT	GO:0005524~ATP binding	28	48.2759	2.8577e-15	ALK, GSK3B, PFKFB3, ABCB1, FLT3, SRC, EGFR, PIK3CG, AURKB, IGF1R, IKBKB, KDR, PIM1, ABCC1, SYK, CSNK2A1, DAPK1, PLK1, MAPK14, TGFBR1, PTK2, CDK6, LCK, KIT, CDK2, CDK1, TOP1, MET	58	1544	19208	6.00572	1.10556e-12	1.0945e-12	8.80171e-13
GOTERM_MF_DIRECT	GO:0004713~protein tyrosine kinase activity	11	18.9655	1.13359e-12	ALK, SYK, FLT3, SRC, LCK, KIT, KDR, MET, PTK2, EGFR, IGF1R	58	113	19208	32.238	4.34145e-10	1.29735e-10	1.0433e-10
GOTERM_MF_DIRECT	GO:0035401~histone H3Y41 kinase activity	11	18.9655	1.35494e-12	ALK, SYK, FLT3, SRC, LCK, KIT, KDR, MET, PTK2, EGFR, IGF1R	58	115	19208	31.6774	5.18933e-10	1.29735e-10	1.0433e-10
GOTERM_MF_DIRECT	GO:0140801~histone H2AXY142 kinase activity	11	18.9655	1.35494e-12	ALK, SYK, FLT3, SRC, LCK, KIT, KDR, MET, PTK2, EGFR, IGF1R	58	115	19208	31.6774	5.18933e-10	1.29735e-10	1.0433e-10
GOTERM_MF_DIRECT	GO:0004714~transmembrane receptor protein tyrosine kinase activity	8	13.7931	1.97718e-11	ALK, FLT3, SRC, KIT, KDR, MET, EGFR, IGF1R	58	39	19208	67.9328	7.57258e-09	1.43221e-09	1.15175e-09
GOTERM_MF_DIRECT	GO:0004672~protein kinase activity	14	24.1379	2.24366e-11	ALK, GSK3B, SYK, DAPK1, SRC, PLK1, MAPK14, TGFBR1, PIK3CG, PTK2, IKBKB, CDK2, CDK1, MET	58	349	19208	13.2849	8.59322e-09	1.43221e-09	1.15175e-09
GOTERM_MF_DIRECT	GO:0004674~protein serine/threonine kinase activity	14	24.1379	9.79907e-11	GSK3B, SYK, CSNK2A1, DAPK1, PLK1, MAPK14, TGFBR1, PIK3CG, AURKB, IKBKB, CDK2, PIM1, CDK1, TOP1	58	393	19208	11.7975	3.75304e-08	5.36149e-09	4.31159e-09
GOTERM_MF_DIRECT	GO:0038062~protein tyrosine kinase collagen receptor activity	7	12.069	6.60101e-09	ALK, FLT3, KIT, KDR, MET, EGFR, IGF1R	58	49	19208	47.3103	2.52818e-06	1.4332e-07	1.15255e-07
GOTERM_MF_DIRECT	GO:0005020~stem cell factor receptor activity	7	12.069	6.60101e-09	ALK, FLT3, KIT, KDR, MET, EGFR, IGF1R	58	49	19208	47.3103	2.52818e-06	1.4332e-07	1.15255e-07
GOTERM_MF_DIRECT	GO:0005018~platelet-derived growth factor alpha-receptor activity	7	12.069	6.60101e-09	ALK, FLT3, KIT, KDR, MET, EGFR, IGF1R	58	49	19208	47.3103	2.52818e-06	1.4332e-07	1.15255e-07
TOP 10
GOTERM_MF_DIRECT	GO:0005004~GPI-linked ephrin receptor activity	7	12.069	6.60101e-09	ALK, FLT3, KIT, KDR, MET, EGFR, IGF1R	58	49	19208	47.3103	2.52818e-06	1.4332e-07	1.15255e-07
GOTERM_MF_DIRECT	GO:0005009~insulin receptor activity	7	12.069	6.60101e-09	ALK, FLT3, KIT, KDR, MET, EGFR, IGF1R	58	49	19208	47.3103	2.52818e-06	1.4332e-07	1.15255e-07
GOTERM_MF_DIRECT	GO:0005011~macrophage colony-stimulating factor receptor activity	7	12.069	6.60101e-09	ALK, FLT3, KIT, KDR, MET, EGFR, IGF1R	58	49	19208	47.3103	2.52818e-06	1.4332e-07	1.15255e-07
GOTERM_MF_DIRECT	GO:0036332~placental growth factor receptor activity	7	12.069	6.60101e-09	ALK, FLT3, KIT, KDR, MET, EGFR, IGF1R	58	49	19208	47.3103	2.52818e-06	1.4332e-07	1.15255e-07
GOTERM_MF_DIRECT	GO:0060175~brain-derived neurotrophic factor receptor activity	7	12.069	6.60101e-09	ALK, FLT3, KIT, KDR, MET, EGFR, IGF1R	58	49	19208	47.3103	2.52818e-06	1.4332e-07	1.15255e-07
GOTERM_MF_DIRECT	GO:0008288~boss receptor activity	7	12.069	6.60101e-09	ALK, FLT3, KIT, KDR, MET, EGFR, IGF1R	58	49	19208	47.3103	2.52818e-06	1.4332e-07	1.15255e-07
GOTERM_MF_DIRECT	GO:0005008~hepatocyte growth factor receptor activity	7	12.069	7.48407e-09	ALK, FLT3, KIT, KDR, MET, EGFR, IGF1R	58	50	19208	46.3641	2.8664e-06	1.4332e-07	1.15255e-07
GOTERM_MF_DIRECT	GO:0005006~epidermal growth factor receptor activity	7	12.069	7.48407e-09	ALK, FLT3, KIT, KDR, MET, EGFR, IGF1R	58	50	19208	46.3641	2.8664e-06	1.4332e-07	1.15255e-07
GOTERM_MF_DIRECT	GO:0005019~platelet-derived growth factor beta-receptor activity	7	12.069	7.48407e-09	ALK, FLT3, KIT, KDR, MET, EGFR, IGF1R	58	50	19208	46.3641	2.8664e-06	1.4332e-07	1.15255e-07
GOTERM_MF_DIRECT	GO:0005007~fibroblast growth factor receptor activity	7	12.069	7.48407e-09	ALK, FLT3, KIT, KDR, MET, EGFR, IGF1R	58	50	19208	46.3641	2.8664e-06	1.4332e-07	1.15255e-07
GOTERM_MF_DIRECT	GO:0005010~insulin-like growth factor receptor activity	7	12.069	8.46264e-09	ALK, FLT3, KIT, KDR, MET, EGFR, IGF1R	58	51	19208	45.455	3.24119e-06	1.47533e-07	1.18643e-07
GOTERM_MF_DIRECT	GO:0106310~protein serine kinase activity	12	20.6897	8.47449e-09	IKBKB, GSK3B, CDK6, CSNK2A1, DAPK1, PLK1, CDK2, CDK1, PIM1, MAPK14, AURKB, PIK3CG	58	365	19208	10.8879	3.24572e-06	1.47533e-07	1.18643e-07
GOTERM_MF_DIRECT	GO:0005021~vascular endothelial growth factor receptor activity	7	12.069	9.54469e-09	ALK, FLT3, KIT, KDR, MET, EGFR, IGF1R	58	52	19208	44.5809	3.65561e-06	1.5894e-07	1.27816e-07
GOTERM_MF_DIRECT	GO:0005005~transmembrane-ephrin receptor activity	7	12.069	1.07387e-08	ALK, FLT3, KIT, KDR, MET, EGFR, IGF1R	58	53	19208	43.7398	4.1129e-06	1.71371e-07	1.37813e-07
GOTERM_MF_DIRECT	GO:0042802~identical protein binding	21	36.2069	8.01135e-08	ALK, BCHE, MAOB, PARP1, CSNK2A1, DAPK1, PLK1, MIF, TYR, ESR1, MMP9, EGFR, PIK3CG, IGF1R, IKBKB, TTR, TERT, LCK, ALB, KDR, MET	58	1777	19208	3.91369	3.0683e-05	1.22734e-06	9.86998e-07
GOTERM_MF_DIRECT	GO:0016301~kinase activity	8	13.7931	4.56233e-06	ALK, GSK3B, CSNK2A1, SYK, DAPK1, CDK1, EGFR, PIK3CG	58	226	19208	11.7229	0.00174585	6.72067e-05	5.40461e-05
GOTERM_MF_DIRECT	GO:0020037~heme binding	7	12.069	6.7184e-06	NOS2, SRC, NOS3, CYP1B1, NOX4, PTGS2, CYP19A1	58	156	19208	14.8603	0.00256985	9.53017e-05	7.66395e-05
GOTERM_MF_DIRECT	GO:0042169~SH2 domain binding	5	8.62069	7.17017e-06	SYK, SRC, LCK, KIT, PTK2	58	42	19208	39.4253	0.00274242	9.80776e-05	7.88718e-05
GOTERM_MF_DIRECT	GO:0019899~enzyme binding	9	15.5172	1.37732e-05	BCHE, AR, PARP1, SRC, MAPK14, PTGS2, ESR1, EGFR, ESR2	58	374	19208	7.96939	0.00526129	0.0001812	0.000145717
GOTERM_MF_DIRECT	GO:0019901~protein kinase binding	10	17.2414	1.41932e-05	CCNA2, IKBKB, GSK3B, SYK, PARP1, LCK, PLK1, ESR1, PTK2, EGFR	58	496	19208	6.67686	0.00542128	0.0001812	0.000145717
GOTERM_MF_DIRECT	GO:0050660~flavin adenine dinucleotide binding	5	8.62069	4.12262e-05	MAOB, NOS2, NOS3, NOX4, XDH	58	65	19208	25.4748	0.0156659	0.000509343	0.000409602
GOTERM_MF_DIRECT	GO:0005515~protein binding	54	93.1034	4.80267e-05	ALK, GSK3B, FLT3, PIK3CG, IGF1R, IKBKB, PIM1, KDR, CYP1B1, PARP1, CSNK2A1
